# Supplementary material for: Rational design of a lead-free Cs 2 Na 0.4 Ag 0.6 In 0.9 Bi 0.1 Cl 6 : 0.15 Mn 2+ double perovskite for enhancing the colour rendition index of UV-pumped W-LEDs
Source: Royal Society of Chemistry journal article supplement (doi:10.1039/d5ra01415h), 2025-01-01
Supplement: d5ra01415h1.pdf [file d5ra01415h1.pdf]

## Supplementary data

### Section 1: Experimental synthesis of BAM: Eu

By altering the ratio of each compound, BAM phosphors were created from the mixture of  $\text{BaCO}_3$ ,  $\text{MgO}$ ,  $\alpha\text{-Al}_2\text{O}_3$ , and  $\text{Eu}_2\text{O}_3$ . Every material utilized was analytical grade and more than 99.9% pure. The thoroughly combined mixture was baked for one hour at 1400–1420 °C in an atmosphere of  $\text{H}_2$  (6%),  $\text{N}_2$  (94%), and oxygen. After being thoroughly ground, the baked sample was baked once more using the same process. The product was then repeatedly cleaned with deionized water after being crushed in a ball mill. Following 48 hours of drying at 120 °C, the BAM: Eu is obtained.

### Section 2: Detailed Synthesis Protocol:

#### Step 1: Optimization of $\text{Ag}^+$ alloyed $\text{Cs}_2\text{NaInCl}_6$

To synthesis the optimised  $\text{Cs}_2\text{Na}_{(1-x)}\text{Ag}_x\text{InCl}_6$ , 2 mmol of NaCl, 2 mmol of  $\text{InCl}_3$  and different mmol of  $\text{AgCl}$  ( $x = 0.2, 0.4, 0.6, 0.8, 1$ ) is taken and it is dissolved in 20ml conc. HCl to prepare the precursor solution. This reaction temperature is maintained at 80°C throughout the reaction temperature. After the precursor materials were dissolved completely in HCl, 4 mmol solution of CsCl was added to the clear solution under constant stirring, white precipitate was formed. For an hour, the reaction was allowed to stir. The reaction mixture was centrifuged and as obtained filtrate was then stored in hot air oven for 8 hours at 60°C for drying.

#### Step 2: Optimization of $\text{Bi}^{3+}$ in $\text{Cs}_2\text{Na}_{(1-x)}\text{Ag}_x\text{InCl}_6$

After obtaining of optimised sample of  $\text{Cs}_2\text{Na}_{(1-x)}\text{Ag}_x\text{InCl}_6$  through the observation of emission spectra maximum of photoluminescence spectroscopy, 0.4 mmol of  $\text{Ag}^+$  is kept constant and different mmol of  $\text{Bi}^{3+}$  is used to optimise  $\text{Cs}_2\text{Na}_{(1-x)}\text{Ag}_x\text{In}_{(1-y)}\text{Bi}_y\text{Cl}_6$ . The precursor solution in 20ml HCl is prepared through the same procedure mentioned above and  $\text{BiCl}_3$  ( $y = 0, 0.1, 0.3, 0.5$  and  $0.7$ ) is also dissolved into the precursor solution. 4 mmol solution of CsCl was added to the clear solution under constant stirring, white precipitate was formed. For an hour, the reaction was allowed to stir. The reaction mixture was centrifuged and as obtained filtrate was then stored in hot air oven for 8 hours at 60°C for drying.

#### Step 3: Optimization of $\text{Mn}^{2+}$ doped $\text{Cs}_2\text{Na}_{(1-x)}\text{Ag}_x\text{In}_{(1-y)}\text{Bi}_y\text{Cl}_6$

After obtaining of optimised sample of  $\text{Cs}_2\text{Na}_{(1-x)}\text{Ag}_x\text{In}_{(1-y)}\text{Bi}_y\text{Cl}_6$  through the observation of emission spectra maximum of photoluminescence spectroscopy. 0.4 mmol of  $\text{Ag}^+$  and 0.1 mmol of  $\text{Bi}^{3+}$  is kept constant.  $\text{Cs}_2\text{Na}_{(1-x)}\text{Ag}_x\text{In}_{(1-y)}\text{Bi}_y\text{Cl}_6 : x\text{Mn}^{2+}$  is synthesised by dissolving the different mmol of  $\text{Mn}^{2+}$  ( $x = 0.07, 0.11, 0.15, 0.18$  and  $0.21$ ) into the  $\text{Cs}_2\text{Na}_{(1-x)}\text{Ag}_x\text{In}_{(1-y)}\text{Bi}_y\text{Cl}_6$  precursor solution. 4 mmol solution of CsCl was added to the clear solution under constant stirring, white precipitate was formed. For an hour, the reaction was allowed to stir. The reaction mixture was centrifuged and as obtained filtrate was then stored in hot air oven for 8 hours at 60°C for drying

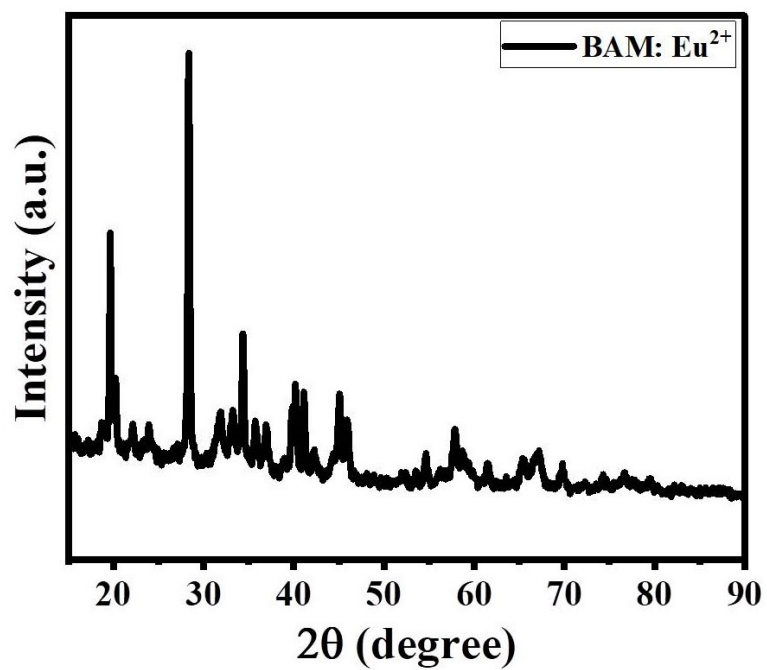

Figure S1: a) X-Ray Diffraction of BAM: Eu

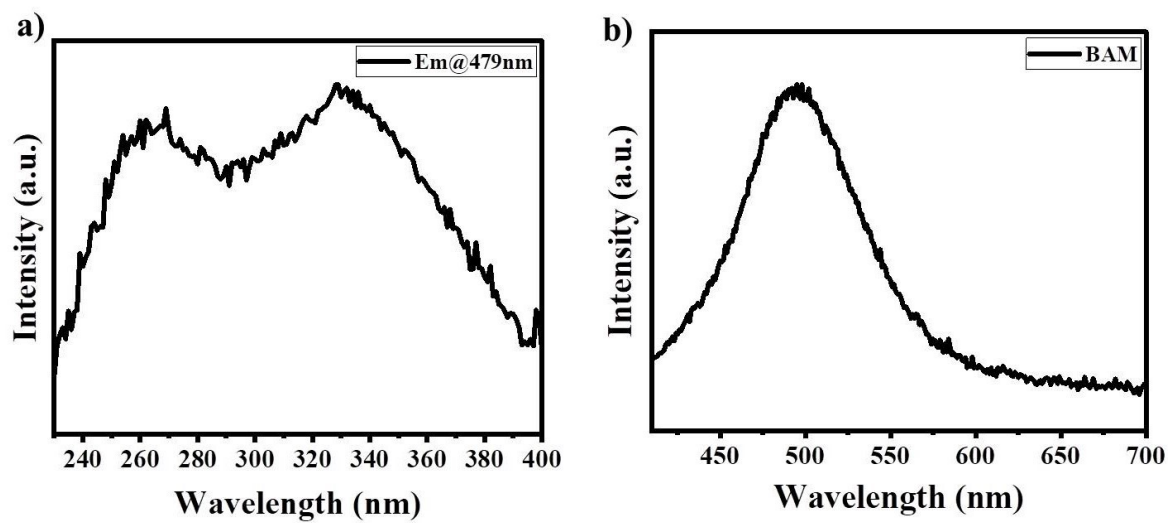

Figure S2: a) PLE of BAM and b) PL emission spectrum of BAM

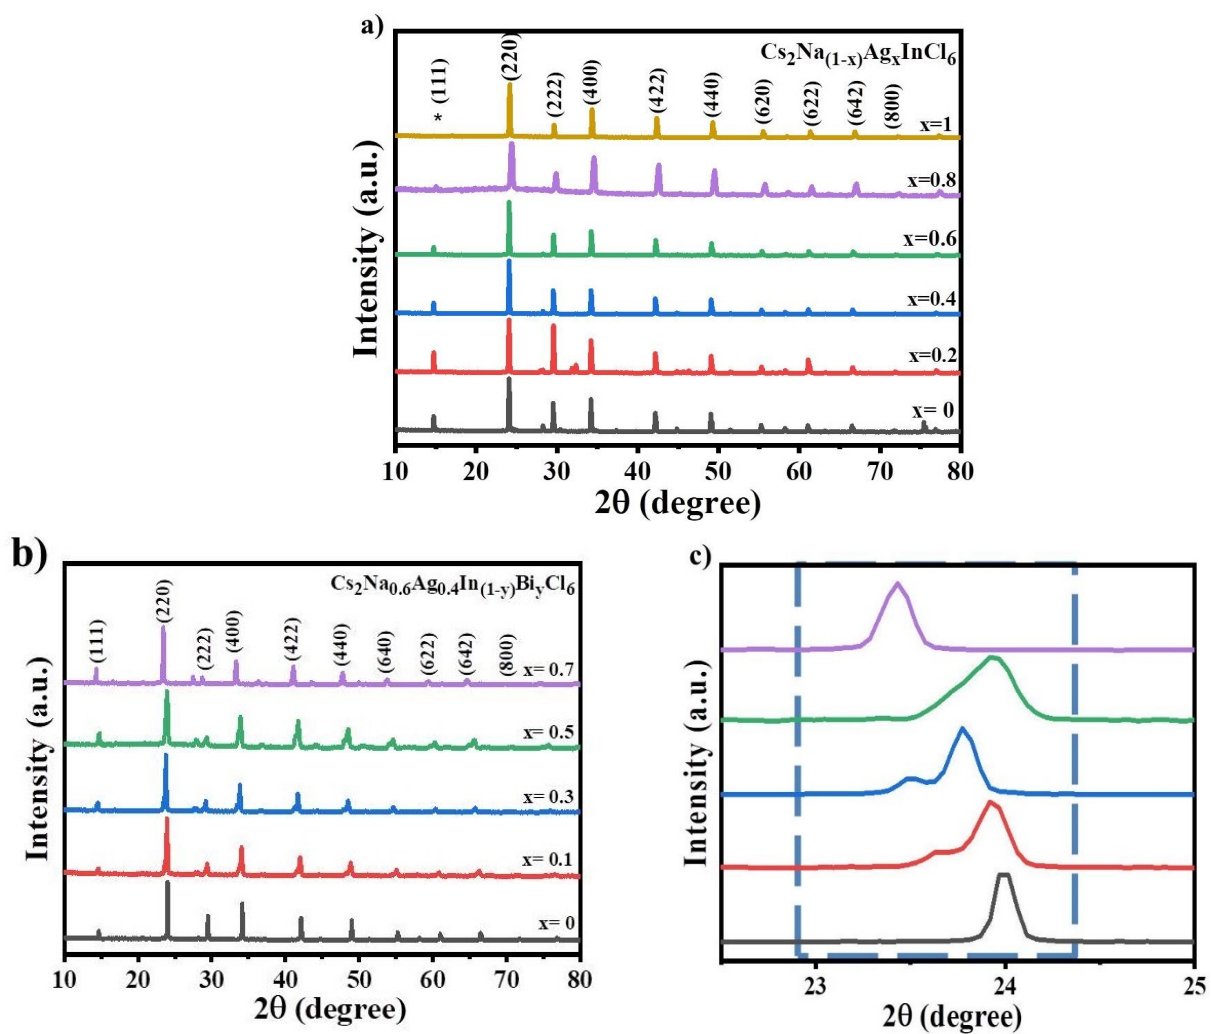

**Figure S3:** a) XRD of  $\text{Ag}^+$  variation, b)  $\text{Bi}^{3+}$  variation and c) Shift in  $\text{Bi}^{3+}$  variation

**Figure S4:** a) W- H plot of  $\text{Cs}_2\text{NaInCl}_6$ , b)  $\text{Cs}_2\text{Na}_{0.6}\text{Ag}_{0.4}\text{InCl}_6$ , c)  $\text{Cs}_2\text{Na}_{0.6}\text{Ag}_{0.4}\text{In}_{0.9}\text{Bi}_{0.1}\text{Cl}_6$ , and

d)  $\text{Cs}_2\text{Na}_{0.6}\text{Ag}_{0.4}\text{In}_{0.9}\text{Bi}_{0.1}\text{Cl}_6 \cdot 0.15\text{Mn}^{2+}$

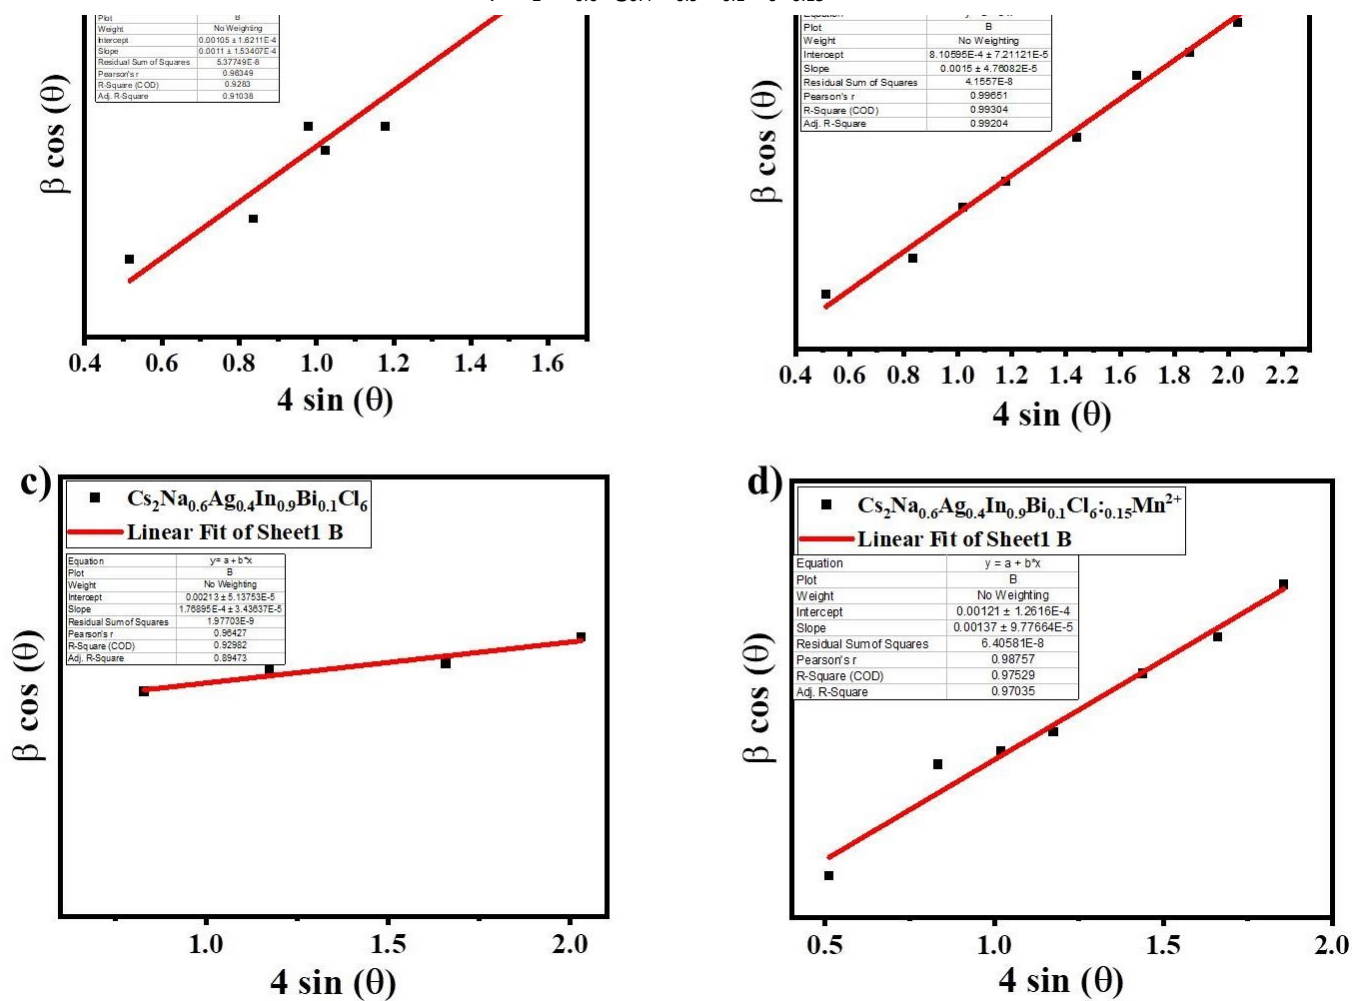

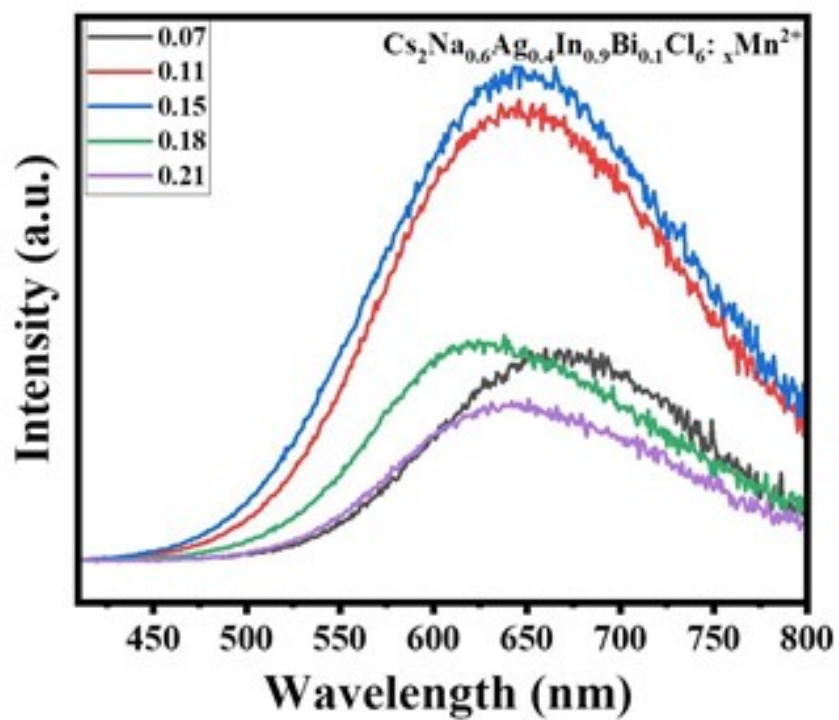

**Figure S5:** Room temperature photoluminescence emission spectra of the  $\text{Cs}_2\text{Na}_{0.4}\text{Ag}_{0.6}\text{In}_{0.9}\text{Bi}_{0.1}\text{Cl}_6 \cdot x\text{Mn}^{2+}$  samples with varying concentration of  $\text{Mn}^{2+}$  ions

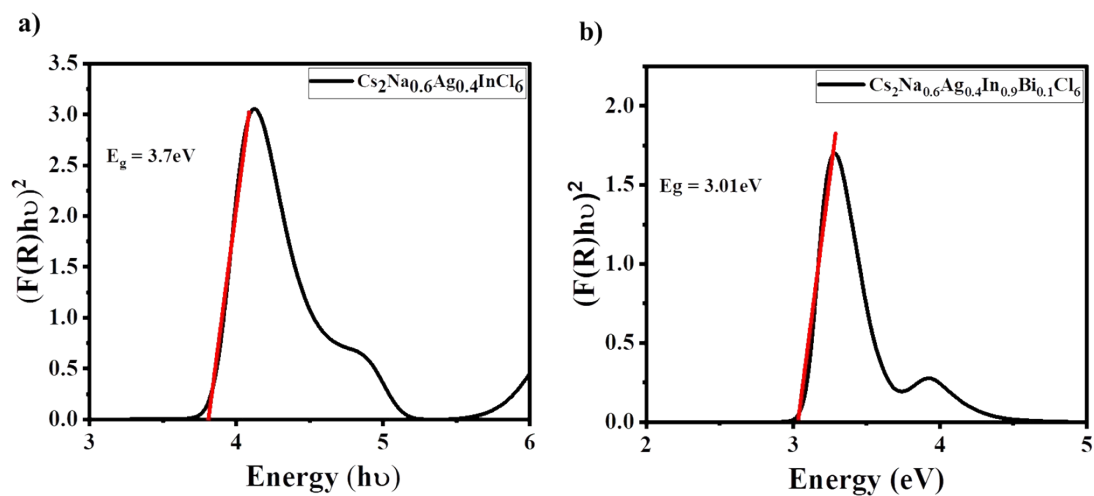

**Figure S6 :** a) Tauc Plot of  $\text{Cs}_2\text{Na}_{0.6}\text{Ag}_{0.4}\text{InCl}_6$  and b)  $\text{Cs}_2\text{Na}_{0.6}\text{Ag}_{0.4}\text{In}_{0.9}\text{Bi}_{0.1}\text{Cl}_6$

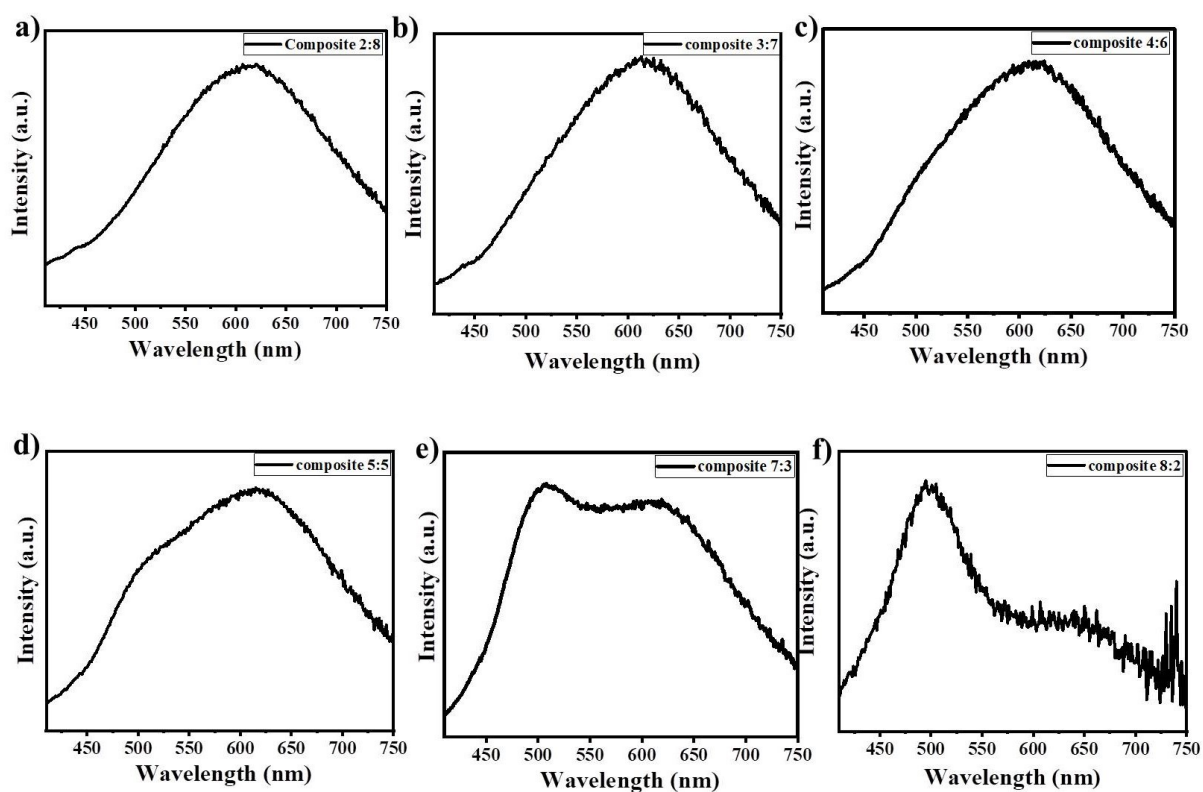

**Figure S7:** a)- f) PL emission spectra of different composite ratio of BAM: DPs

**CIE 1931**

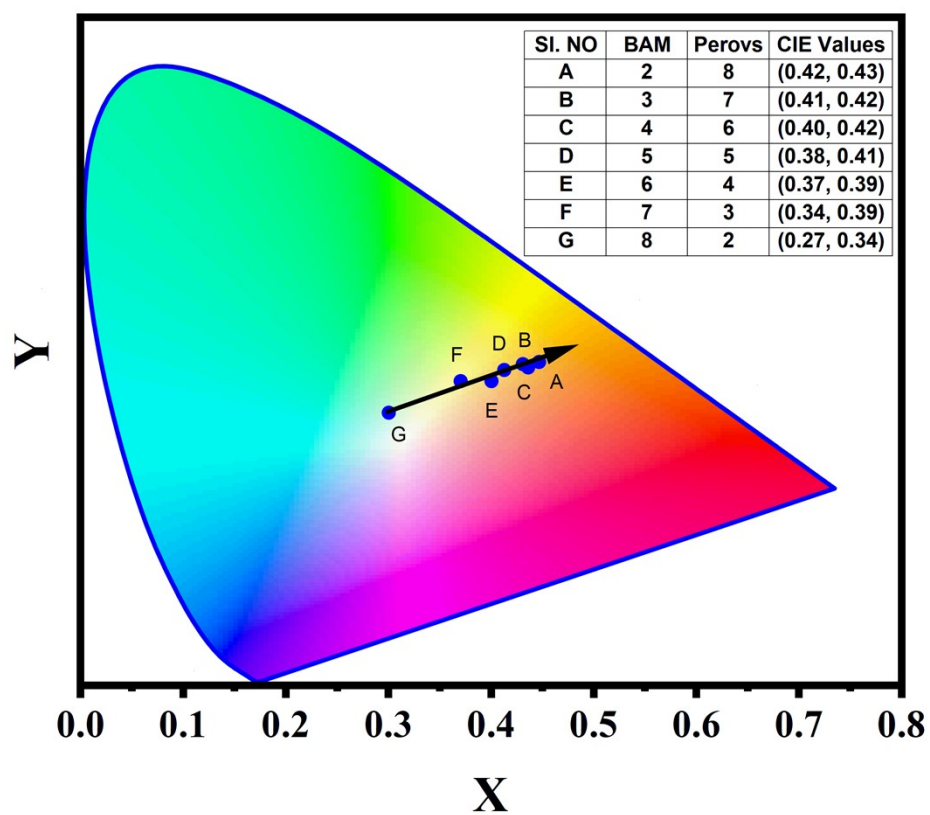

**Figure S8:** CIE of different composite ratio of BAM: DPs

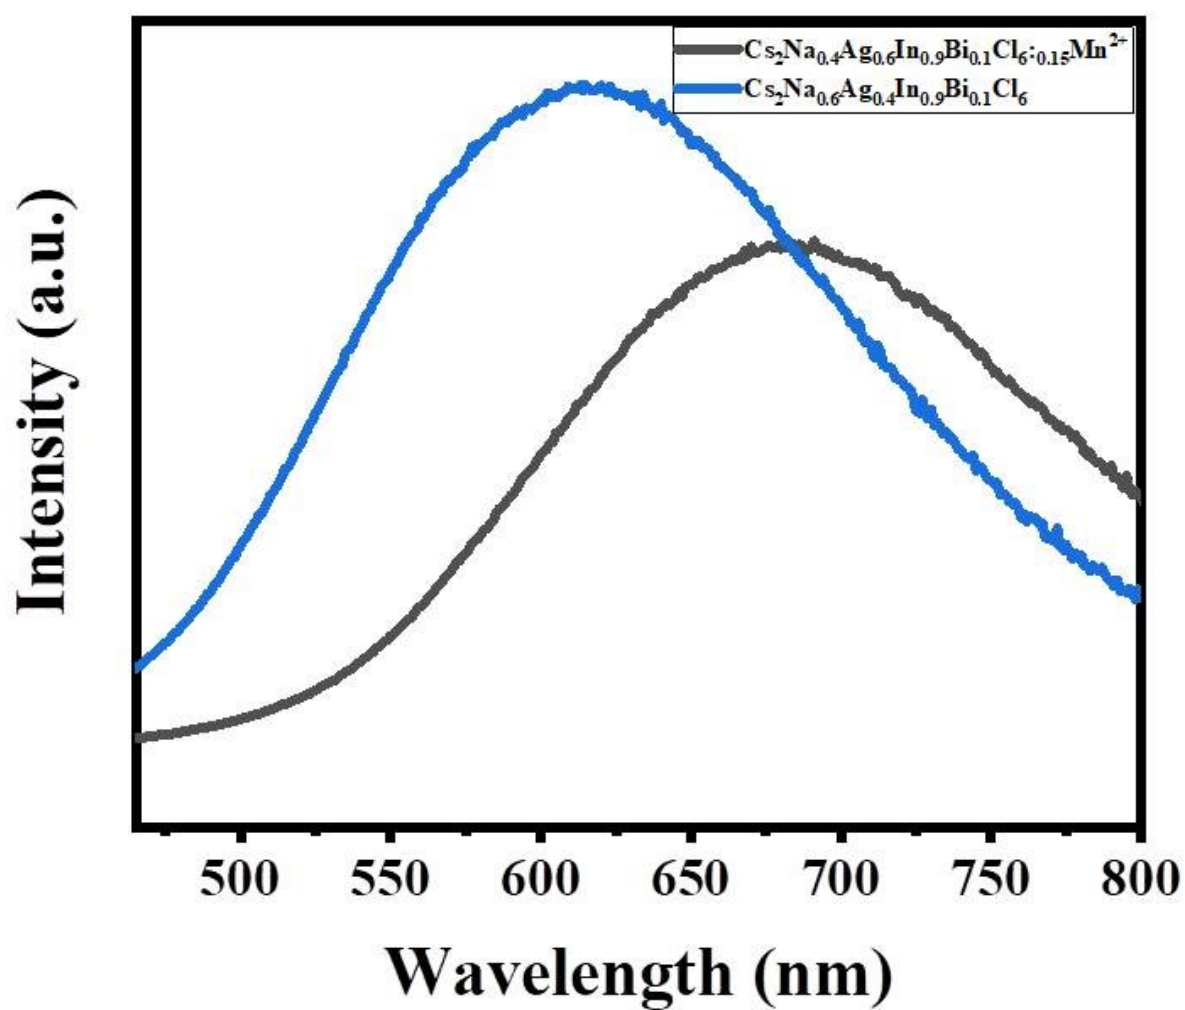

**Figure S9:** Emission spectra of optimised host lattice with and without  $\text{Mn}^{2+}$  doping. Concentration of  $\text{Mn}^{2+}$  is 0.15 mmol



**Table S1:** PLQY of  $\text{Cs}_2\text{NaInCl}_6$ ,  $\text{Cs}_2\text{Na}_{0.6}\text{Ag}_{0.4}\text{InCl}_6$ ,  $\text{Cs}_2\text{Na}_{0.6}\text{Ag}_{0.4}\text{In}_{0.9}\text{Bi}_{0.1}\text{Cl}_6$ , and

$\text{Cs}_2\text{Na}_{0.6}\text{Ag}_{0.4}\text{In}_{0.9}\text{Bi}_{0.1}\text{Cl}_6: 0.15\text{Mn}^{2+}$

| Perovskites                                                                                              | PLQY  |
|----------------------------------------------------------------------------------------------------------|-------|
| $\text{Cs}_2\text{NaInCl}_6$                                                                             | 1.8%  |
| $\text{Cs}_2\text{Na}_{0.6}\text{Ag}_{0.4}\text{InCl}_6$                                                 | 22.1% |
| $\text{Cs}_2\text{Na}_{0.6}\text{Ag}_{0.4}\text{In}_{0.9}\text{Bi}_{0.1}\text{Cl}_6$                     | 29.4% |
| $\text{Cs}_2\text{Na}_{0.6}\text{Ag}_{0.4}\text{In}_{0.9}\text{Bi}_{0.1}\text{Cl}_6: 0.15\text{Mn}^{2+}$ | 44.9% |
